# Supplementary material for: [Mn(CO)4{S2CNMe(CH2CO2H)}], a new water-soluble CO-releasing molecule
Source: Royal Society of Chemistry journal article supplement (doi:10.1039/c1dt10125k), 2011-01-01
Supplement: c1dt10125k.pdf [file c1dt10125k.pdf]

# [Mn(CO)<sub>4</sub>S<sub>2</sub>CNMe(CH<sub>2</sub>CO<sub>2</sub>H)], a new CO-Releasing Molecule (CO-RM) Supplementary information

Sian H. Crook,<sup>1</sup> Brian E. Mann,<sup>1,\*</sup> Anthony J. H. M. Meijer,<sup>1</sup> Harry Adams,<sup>1</sup> Philip Sawle,<sup>2</sup> David Scapens,<sup>1</sup> and Roberto Motterlini<sup>3,†</sup>

<sup>1</sup>*Department of Chemistry, University of Sheffield, Sheffield S3 7HF, United Kingdom*

<sup>2</sup>*Vascular Biology Unit, Department of Surgical Research, Northwick Park Institute for Medical Research, Harrow, Middlesex, United Kingdom*

<sup>3</sup>*Department of Drug Discovery and Development, Italian Institute of Technology, Via Morego, 30, 16163 Genova, Italy*

(Dated: August 3, 2010)

## Contents

|                                                                                                                                     |           |
|-------------------------------------------------------------------------------------------------------------------------------------|-----------|
| <b>1. [Mn(CO)<sub>4</sub>S<sub>2</sub>CNMe(CH<sub>2</sub>CO<sub>2</sub>)]<sup>-</sup> Minimum Energy w/o solvent</b>                | <b>2</b>  |
| General Information                                                                                                                 | 2         |
| Cartesian Co-ordinates (XYZ format)                                                                                                 | 2         |
| <b>2. [Mn(CO)<sub>4</sub>S<sub>2</sub>CNMe(CH<sub>2</sub>CO<sub>2</sub>)]<sup>-</sup> Transition state CO release w/o solvent</b>   | <b>3</b>  |
| General Information                                                                                                                 | 3         |
| Cartesian Co-ordinates (XYZ format)                                                                                                 | 3         |
| <b>3. [Mn(CO)<sub>4</sub>S<sub>2</sub>CNMe(CH<sub>2</sub>CO<sub>2</sub>)]<sup>-</sup> Dissociated w/o solvent</b>                   | <b>4</b>  |
| General Information                                                                                                                 | 4         |
| Cartesian Co-ordinates (XYZ format)                                                                                                 | 4         |
| <b>4. [Mn(CO)bipy]<sup>+</sup> Minimum Energy w/o solvent</b>                                                                       | <b>5</b>  |
| General Information                                                                                                                 | 5         |
| Cartesian Co-ordinates (XYZ format)                                                                                                 | 5         |
| <b>5. [Mn(CO)bipy]<sup>+</sup> Transition State CO release w/o solvent</b>                                                          | <b>6</b>  |
| General Information                                                                                                                 | 6         |
| Cartesian Co-ordinates (XYZ format)                                                                                                 | 7         |
| <b>6. [Mn(CO)bipy]<sup>+</sup> CO Dissociated w/o solvent</b>                                                                       | <b>7</b>  |
| General Information                                                                                                                 | 7         |
| Cartesian Co-ordinates (XYZ format)                                                                                                 | 7         |
| <b>7. [Mn(CO)<sub>4</sub>S<sub>2</sub>CNMe(CH<sub>2</sub>CO<sub>2</sub>)]<sup>-</sup> Minimum Energy Structure w/ water solvent</b> | <b>8</b>  |
| General Information                                                                                                                 | 8         |
| Cartesian Co-ordinates (XYZ format)                                                                                                 | 9         |
| <b>8. [Mn(CO)<sub>4</sub>S<sub>2</sub>CNMe(CH<sub>2</sub>CO<sub>2</sub>)]<sup>-</sup> Transition State w/ water solvent</b>         | <b>10</b> |
| General Information                                                                                                                 | 10        |
| Cartesian Co-ordinates (XYZ format)                                                                                                 | 10        |
| <b>9. [Mn(CO)<sub>4</sub>S<sub>2</sub>CNMe(CH<sub>2</sub>CO<sub>2</sub>)]<sup>-</sup> Dissociated w/ water solvent</b>              | <b>11</b> |
| General Information                                                                                                                 | 11        |
| Cartesian Co-ordinates (XYZ format)                                                                                                 | 11        |
| <b>10. [Mn(CO)bipy]<sup>+</sup> CO Minimum Energy Structure w/ water solvent</b>                                                    | <b>12</b> |
| General Information                                                                                                                 | 12        |
| Cartesian Co-ordinates (XYZ format)                                                                                                 | 12        |
| <b>11. [Mn(CO)bipy]<sup>+</sup> CO Dissociation w/ water solvent</b>                                                                | <b>13</b> |
| General Information                                                                                                                 | 13        |

Cartesian Co-ordinates (XYZ format)

References

1.  $[\text{Mn}(\text{CO})_4\text{S}_2\text{CNMe}(\text{CH}_2\text{CO}_2)]^-$  MINIMUM ENERGY W/O SOLVENT

## General Information

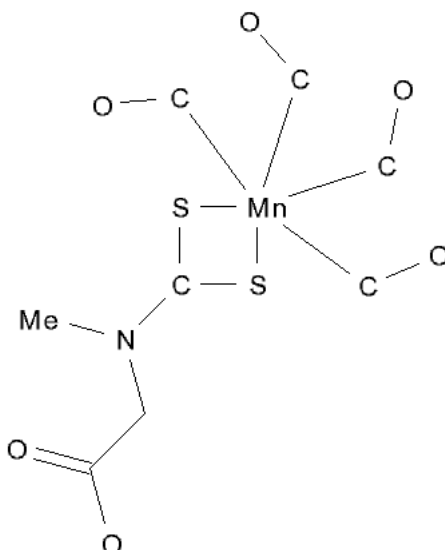

SMILES : CN(CC(=O)[O])[C]1S[Mn](S1)([C][O])([C][O])([C][O])[C][O]  
 Formula :  $\text{C}_8\text{H}_5\text{MnNO}_6\text{S}_2^{1-}$   
 Charge : -1  
 Multiplicity : 1  
 Energy : -2761.78948073 a.u.

## Cartesian Co-ordinates (XYZ format)

23

```

Mn -1.21869433  0.18611202 -1.31881690
S  -1.22042859  0.19067258  1.12182772
S   1.11461532  0.20064883 -0.60765284
N   1.31496954  0.22767906  2.09267092
O  -1.02832377 -2.80606604 -1.07800949
O  -0.64593089  0.18577419 -4.22068167
O  -4.16000271  0.17135771 -1.62847757
O  -1.04732347  3.17377806 -1.07829034
O   2.83142352 -1.85052514  3.29063630
O   4.75592566 -0.96554923  2.47036314
C  -1.10813761 -1.67433703 -1.18250668
C  -0.87266964  0.18474525 -3.09371066
C  -3.01576829  0.17558193 -1.51317179
C  -1.12504065  2.04045820 -1.18681490

```

|   |             |             |            |
|---|-------------|-------------|------------|
| C | 0.52893162  | 0.20261328  | 1.03626764 |
| C | 2.78726220  | 0.22222397  | 2.01115942 |
| H | 3.14798474  | 1.12397575  | 2.51688480 |
| H | 3.08674169  | 0.27606860  | 0.96830082 |
| C | 3.53545761  | -1.03014922 | 2.67230964 |
| C | 0.78303754  | 0.23335451  | 3.45831585 |
| H | -0.28028592 | 0.00744888  | 3.45032024 |
| H | 0.94186378  | 1.22293878  | 3.90193224 |
| H | 1.33469701  | -0.53522950 | 4.00207186 |

## 2. $[\text{Mn}(\text{CO})_4\text{S}_2\text{CNME}(\text{CH}_2\text{CO}_2)]^-$ TRANSITION STATE CO RELEASE W/O SOLVENT

### General Information

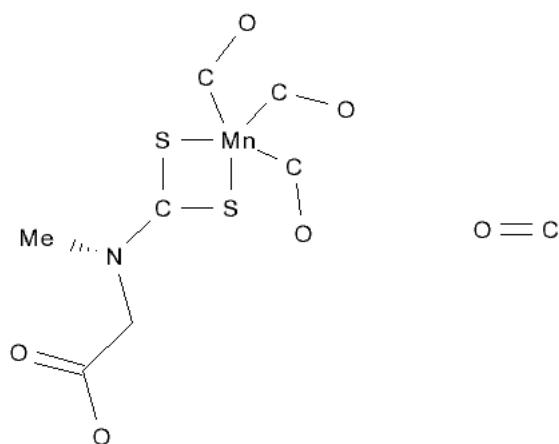

SMILES : CN(CC(=O)[O])[C]1S[Mn](S1)([C][O])([C][O])[C][O].[C]=O  
 Formula :  $\text{C}_8\text{H}_5\text{MnNO}_6\text{S}_2^{1-}$   
 Charge : -1  
 Multiplicity : 1  
 Energy : -2761.75529322 a.u.

### Cartesian Co-ordinates (XYZ format)

23

|    |             |             |             |
|----|-------------|-------------|-------------|
| Mn | -1.06909180 | 0.60839063  | -1.13366175 |
| S  | -1.19870746 | 0.84347105  | 1.20821464  |
| S  | 1.15107989  | 1.02824295  | -0.49067089 |
| N  | 1.31683052  | 0.43946320  | 2.14675283  |
| O  | -0.15398793 | -3.65004039 | -0.09062310 |
| O  | -0.25203303 | -0.27231872 | -3.83589172 |
| O  | -3.76439857 | -0.59753269 | -1.29222929 |
| O  | -1.94222832 | 3.25543427  | -2.00767303 |
| O  | 1.87170100  | -2.22455478 | 1.79252553  |

|   |             |             |             |
|---|-------------|-------------|-------------|
| O | 4.11343288  | -1.86250174 | 1.90205574  |
| C | -0.16007103 | -2.53040838 | -0.22876157 |
| C | -0.57798612 | 0.07928002  | -2.79096293 |
| C | -2.72032213 | -0.11688326 | -1.24223280 |
| C | -1.61868787 | 2.19516563  | -1.69351280 |
| C | 0.54850006  | 0.75291473  | 1.12323117  |
| C | 2.71865106  | 0.03759195  | 1.98801744  |
| H | 3.27943826  | 0.40124509  | 2.85100603  |
| H | 3.12684107  | 0.48978385  | 1.08734453  |
| C | 2.91708803  | -1.54893887 | 1.88001800  |
| C | 0.73618644  | 0.08337241  | 3.44344211  |
| H | -0.21532841 | 0.59028608  | 3.58545375  |
| H | 1.43678355  | 0.38507450  | 4.22437811  |
| H | 0.60374767  | -1.00027287 | 3.46464634  |

### 3. $[\text{Mn}(\text{CO})_4\text{S}_2\text{CNME}(\text{CH}_2\text{CO}_2)]^-$ DISSOCIATED W/O SOLVENT

#### General Information

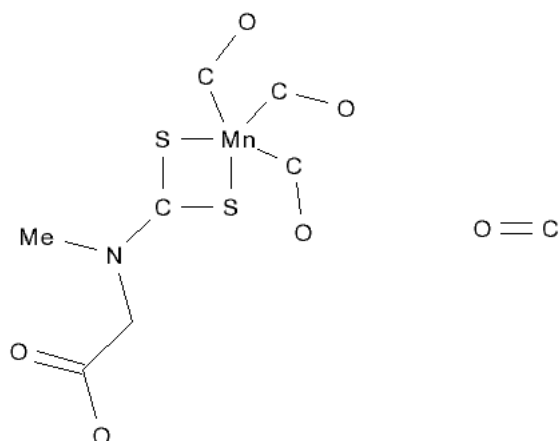

SMILES : CN(CC(=O)[O])[C]1S[Mn](S1)([C][O])([C][O])[C][O].[C]=O  
 Formula :  $\text{C}_8\text{H}_5\text{MnNO}_6\text{S}_2^{1-}$   
 Charge : -1  
 Multiplicity : 1  
 Energy : -2761.75262981 a.u.

#### Cartesian Co-ordinates (XYZ format)

23

|    |             |            |             |
|----|-------------|------------|-------------|
| Mn | -1.22132659 | 1.19017339 | -1.23847818 |
| S  | -1.19452310 | 1.32316196 | 1.10645497  |
| S  | 1.00088561  | 0.70988679 | -0.67691439 |
| N  | 1.30461776  | 0.73609346 | 2.02141595  |

```

O  0.66446030 -8.31519604 -0.81753606
O  -0.84880579  0.17150928 -3.98845720
O  -4.16792393  0.96508986 -1.29865849
O  -1.17627287  4.00468969 -2.02100682
O  2.03186655 -1.78242731  3.05881429
O  4.16930151 -1.51038706  2.33540392
C  -0.00968857 -8.65625954  0.01834652
C  -0.99763441  0.58545625 -2.92559147
C  -3.02228999  1.07390201 -1.28765023
C  -1.22330570  2.88713527 -1.74544251
C  0.50651002  0.89608133  0.99353832
C  2.69386363  0.26512286  1.91026330
H  3.32633543  0.97268665  2.45331860
H  2.98931456  0.26274827  0.86524451
C  2.98458648 -1.19987679  2.51221466
C  0.83261347  0.87455463  3.40367413
H  -0.19177739  1.23561108  3.41913939
H  1.48580575  1.58467638  3.91897917
H  0.92042738 -0.11441962  3.85811830

```

#### 4. [MN(CO)BIPY]<sup>+</sup> MINIMUM ENERGY W/O SOLVENT

##### General Information

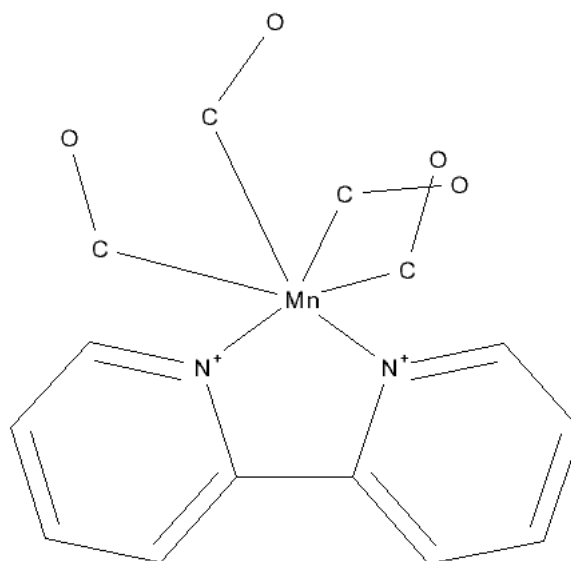

```

SMILES   : c1cc[n+]2c(c1)-c3cccc[n+]3[Mn]2([C][O])([C][O])([C][O])[C][O]
Formula  : C14H8MnN2O4+
Charge   : 1
Multiplicity : 1
Energy   : -2099.83616687 a.u.

```

##### Cartesian Co-ordinates (XYZ format)

|    |             |             |             |
|----|-------------|-------------|-------------|
| Mn | 0.06927738  | -0.03099836 | 0.03775196  |
| O  | 0.44537309  | 0.06855744  | 3.04009461  |
| C  | 0.31139228  | 0.03006504  | 1.91572297  |
| O  | 2.46551991  | 1.69485688  | -0.37468466 |
| C  | 1.55823958  | 1.02436054  | -0.21801810 |
| O  | 1.69824994  | -2.52216220 | -0.13816719 |
| C  | 1.08742559  | -1.56303489 | -0.07293031 |
| O  | -0.46187183 | -0.10194018 | -2.94183946 |
| C  | -0.25625309 | -0.07657204 | -1.82795596 |
| C  | -2.57116127 | 1.22117269  | 0.40132475  |
| C  | -0.95443183 | 2.86544752  | 0.11073347  |
| C  | -3.56370234 | 2.19417286  | 0.52326167  |
| C  | -2.83502483 | -0.22823068 | 0.48270723  |
| C  | -1.89346814 | 3.88036180  | 0.22349842  |
| H  | 0.08823077  | 3.10121703  | -0.05321535 |
| C  | -3.22403431 | 3.53754735  | 0.43381253  |
| H  | -4.59339523 | 1.90978122  | 0.68658829  |
| C  | -4.10346794 | -0.77116573 | 0.69005132  |
| H  | -1.57807159 | 4.91252995  | 0.14663790  |
| H  | -3.98598099 | 4.30148506  | 0.52692616  |
| C  | -1.90516043 | -2.35685301 | 0.40351078  |
| C  | -4.25926542 | -2.14948821 | 0.75332272  |
| H  | -4.96411896 | -0.12722671 | 0.80160332  |
| C  | -3.13845134 | -2.95855594 | 0.60727847  |
| H  | -1.01526380 | -2.96016669 | 0.28638828  |
| H  | -5.23900223 | -2.58212233 | 0.91387063  |
| H  | -3.20736670 | -4.03757238 | 0.64885014  |
| N  | -1.27440774 | 1.56288922  | 0.19596593  |
| N  | -1.74536157 | -1.02387083 | 0.34091058  |

## 5. $[\text{Mn}(\text{CO})\text{BIPY}]^+$ TRANSITION STATE CO RELEASE W/O SOLVENT

### General Information

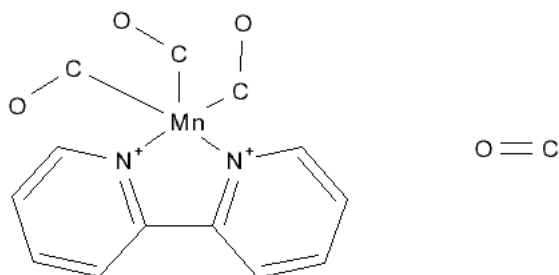

SMILES : [C]=O.c1cc[n+]2c(c1)-c3cccc[n+]3[Mn]2([C][O])([C][O])[C][O]  
 Formula : C<sub>14</sub>H<sub>8</sub>MnN<sub>2</sub>O<sub>4</sub><sup>+</sup>  
 Charge : 1  
 Multiplicity : 1  
 Energy : -2099.79336031 a.u.

### Cartesian Co-ordinates (XYZ format)

29

```
Mn -1.16194558 0.00195449 1.31953633
O 1.26728249 -0.02316000 -4.87183142
C 1.38269663 -0.01699607 -3.75298500
O -3.26139116 2.10869598 1.45585668
C -2.46027327 1.29841709 1.42274773
O -3.25726652 -2.10770679 1.47309911
C -2.45773578 -1.29615879 1.43336773
O -0.68792307 0.01432160 4.22126675
C -0.91096956 0.00951456 3.10311675
C 1.47753441 0.73865676 0.33293030
C 0.26574305 2.65323782 0.85859704
C 2.55250931 1.51255691 -0.09664045
C 1.47898221 -0.73764694 0.33899248
C 1.30346978 3.48037720 0.45439413
H -0.65349191 3.07500172 1.24116266
C 2.46659136 2.89869905 -0.03570189
H 3.45051551 1.04452932 -0.47358888
C 2.55547833 -1.51293945 -0.08421751
H 1.19189739 4.55420017 0.52562296
H 3.29681158 3.51177335 -0.36423680
C 0.27095783 -2.65022278 0.88040107
C 2.47228241 -2.89870095 -0.01189009
H 3.45256948 -1.04625988 -0.46499801
C 1.31030846 -3.47861552 0.48299527
H -0.64744598 -3.07063198 1.26643860
H 3.30370617 -3.51282310 -0.33538595
H 1.20084846 -4.55203390 0.56305420
N 0.33721483 1.31042612 0.80019295
N 0.33978540 -1.30779934 0.81095183
```

## 6. [MN(CO)BIPY]<sup>+</sup> CO DISSOCIATED W/O SOLVENT

### General Information

SMILES : [C]=O.c1cc[n+]2c(c1)-c3cccc[n+]3[Mn]2([C][O])([C][O])[C][O]  
 Formula : C<sub>14</sub>H<sub>8</sub>MnN<sub>2</sub>O<sub>4</sub><sup>+</sup>  
 Charge : 1  
 Multiplicity : 1  
 Energy : -2099.79234146 a.u.

### Cartesian Co-ordinates (XYZ format)

29

```
Mn 0.91258073 1.17305756 0.07463979
O -10.10190678 -0.29209691 -0.49055874
```

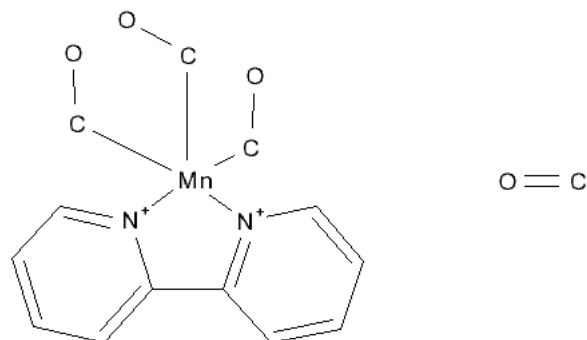

|   |             |             |             |
|---|-------------|-------------|-------------|
| C | -8.99005795 | -0.11807857 | -0.44567126 |
| O | 0.59450871  | 3.29187202  | -1.99309611 |
| C | 0.73357278  | 2.48818111  | -1.19691122 |
| O | 0.39200419  | 3.17508030  | 2.21622658  |
| C | 0.60853434  | 2.41635203  | 1.39365220  |
| O | 3.83200788  | 1.48902285  | 0.22585581  |
| C | 2.69637585  | 1.40588176  | 0.16799323  |
| C | 0.72258097  | -1.61507356 | -0.75118655 |
| C | 0.98857558  | -0.25234357 | -2.61719108 |
| C | 0.64924783  | -2.74505758 | -1.56175911 |
| C | 0.64788657  | -1.65553737 | 0.72310507  |
| C | 0.92914116  | -1.33780754 | -3.47931814 |
| H | 1.12259698  | 0.74807888  | -3.00504255 |
| C | 0.75317603  | -2.60690975 | -2.94137812 |
| H | 0.51635206  | -3.72586727 | -1.12774050 |
| C | 0.49208626  | -2.82754898 | 1.45891511  |
| H | 1.01960206  | -1.18067718 | -4.54596138 |
| H | 0.69981253  | -3.47822881 | -3.58246493 |
| C | 0.72518778  | -0.39833257 | 2.67839193  |
| C | 0.45641872  | -2.76552343 | 2.84748769  |
| H | 0.40198922  | -3.78227901 | 0.96050280  |
| C | 0.57877898  | -1.52885890 | 3.46926689  |
| H | 0.82009518  | 0.57853454  | 3.13214397  |
| H | 0.33693594  | -3.67003536 | 3.43111086  |
| H | 0.56165576  | -1.43073177 | 4.54661226  |
| N | 0.88479751  | -0.37437534 | -1.28088832 |
| N | 0.75602037  | -0.44651368 | 1.33375072  |

7.  $[\text{Mn}(\text{CO})_4\text{S}_2\text{CNME}(\text{CH}_2\text{CO}_2)]^-$  MINIMUM ENERGY STRUCTURE W/ WATER SOLVENT

General Information



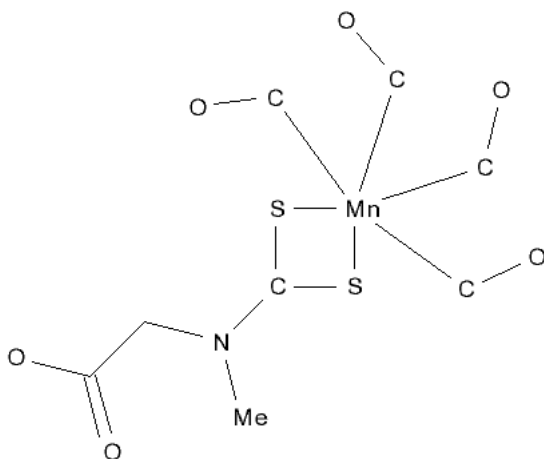

SMILES : CN(CC(=O)[O])[C]1S[Mn](S1)([C][O])([C][O])([C][O])[C][O]  
 Formula :  $C_8H_5MnNO_6S_2^{1-}$   
 Charge : -1  
 Multiplicity : 1  
 Energy : -2761.87135384 a.u.

#### Cartesian Co-ordinates (XYZ format)

23

|    |             |             |             |
|----|-------------|-------------|-------------|
| Mn | -1.70970666 | -0.11688242 | -0.02101470 |
| S  | -0.07603597 | 1.47870934  | 0.86420244  |
| S  | 0.45403987  | -0.66224104 | -1.02575207 |
| N  | 2.38119531  | 1.03632426  | -0.18204875 |
| O  | -0.86785752 | -1.90454030 | 2.24484611  |
| O  | -3.23099756 | -2.26336265 | -1.37815440 |
| O  | -4.03615522 | 0.95826977  | 1.46091974  |
| O  | -2.04543495 | 1.80781460  | -2.30397677 |
| O  | 3.64887047  | -0.98311871 | 1.20201027  |
| O  | 4.99122047  | -1.47554028 | -0.54946393 |
| C  | -1.20860553 | -1.23479843 | 1.38861716  |
| C  | -2.64964199 | -1.42916536 | -0.84819460 |
| C  | -3.14043021 | 0.53537011  | 0.88332546  |
| C  | -1.94238150 | 1.07308316  | -1.43914080 |
| C  | 1.11006665  | 0.67008621  | -0.11992647 |
| C  | 3.38563895  | 0.22453137  | -0.87262821 |
| H  | 4.14916134  | 0.89649296  | -1.26706982 |
| H  | 2.92079258  | -0.28270653 | -1.71720815 |
| C  | 4.07690716  | -0.85640293 | 0.03528447  |
| C  | 2.90940189  | 2.10493922  | 0.66911894  |
| H  | 2.13704085  | 2.84234619  | 0.87508023  |
| H  | 3.73535752  | 2.58665490  | 0.14635399  |
| H  | 3.27382374  | 1.67661190  | 1.60543597  |

8.  $[\text{Mn}(\text{CO})_4\text{S}_2\text{CNME}(\text{CH}_2\text{CO}_2)]^-$  TRANSITION STATE W/ WATER SOLVENT

## General Information

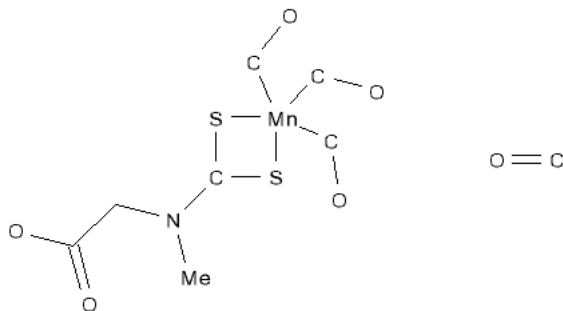

SMILES : CN(CC(=O)[O])[C]1S[Mn](S1)([C][O])([C][O])[C][O].[C]=O  
 Formula :  $\text{C}_8\text{H}_5\text{MnNO}_6\text{S}_2^{1-}$   
 Charge : -1  
 Multiplicity : 1  
 Energy : -2761.83661290 a.u.

## Cartesian Co-ordinates (XYZ format)

23

|    |             |             |             |
|----|-------------|-------------|-------------|
| Mn | 1.85682797  | 0.11779650  | -0.03446650 |
| S  | 0.46484062  | -1.05385423 | 1.48305678  |
| S  | -0.12335733 | -0.32206690 | -1.26107192 |
| N  | -1.94992077 | -1.53192055 | 0.32962701  |
| O  | 3.79188704  | 0.89490467  | 2.06650019  |
| O  | 2.85499072  | 2.10596895  | -1.98604429 |
| O  | -2.55617023 | 3.94218349  | 0.67188203  |
| O  | 3.51785398  | -2.05948496 | -1.05101204 |
| O  | -3.57514095 | 0.68856531  | 0.39833140  |
| O  | -4.72983170 | 0.02430788  | -1.42907107 |
| C  | -1.63617980 | 3.29504895  | 0.59984976  |
| C  | 2.48316646  | 1.32401514  | -1.23207760 |
| C  | 3.05168986  | 0.58986384  | 1.24357414  |
| C  | 2.90071344  | -1.17398739 | -0.65220171 |
| C  | -0.73047078 | -1.05213106 | 0.20504287  |
| C  | -2.96228671 | -1.36525941 | -0.71795833 |
| H  | -3.61199641 | -2.24123120 | -0.69741559 |
| H  | -2.47334981 | -1.33034611 | -1.68964803 |

C -3.84484196 -0.07329839 -0.55478638  
 C -2.46026897 -2.05527592 1.60060775  
 H -1.64059377 -2.26260710 2.28209233  
 H -3.01287174 -2.97463322 1.40312350  
 H -3.12910867 -1.31045210 2.03519654

9.  $[\text{Mn}(\text{CO})_4\text{S}_2\text{CNME}(\text{CH}_2\text{CO}_2)]^-$  DISSOCIATED W/ WATER SOLVENT

General Information

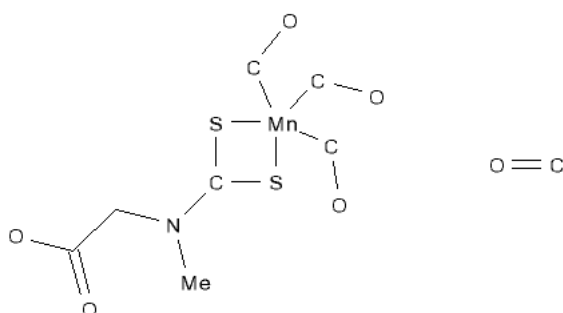

SMILES : CN(CC(=O)[O])[C]1S[Mn](S1)([C][O])([C][O])[C][O].[C]=O  
 Formula :  $\text{C}_8\text{H}_5\text{MnNO}_6\text{S}_2^{1-}$   
 Charge : -1  
 Multiplicity : 1  
 Energy : -2761.83561666 a.u.

Cartesian Co-ordinates (XYZ format)

23

Mn 1.77827847 0.90114880 -0.06654660  
 S 1.14962018 -0.77185053 1.50057936  
 S 0.43309659 -0.59802908 -1.30517364  
 N -0.52011520 -2.55373216 0.30787966  
 O -6.74311876 4.80286026 0.85487813  
 O 1.78926992 2.94119239 -2.21212292  
 O 2.75469470 2.76263881 2.01829839  
 O 4.44042253 -0.10126520 -0.72938645  
 O -3.09206343 -1.58918166 0.16652763  
 O -3.58855915 -2.88280010 -1.62074220  
 C -7.64819050 4.15008593 0.69896388  
 C 1.79646230 2.15294480 -1.37744308  
 C 2.39142299 2.04154444 1.20207453

```

C   3.40874529  0.33726758 -0.46997425
C   0.23604733 -1.48274767  0.18969364
C  -1.38938475 -3.01817346 -0.77791697
H  -1.44663846 -4.10576200 -0.71891814
H  -0.94282252 -2.75463009 -1.73489571
C  -2.84631491 -2.42588067 -0.72703958
C  -0.73642898 -3.21718955  1.59742844
H   0.04141319 -2.93849039  2.30229783
H  -0.71810430 -4.29623842  1.44134951
H  -1.71374953 -2.91814613  1.98032248

```

### 10. [Mn(CO)BIPY]<sup>+</sup> CO MINIMUM ENERGY STRUCTURE W/ WATER SOLVENT

#### General Information

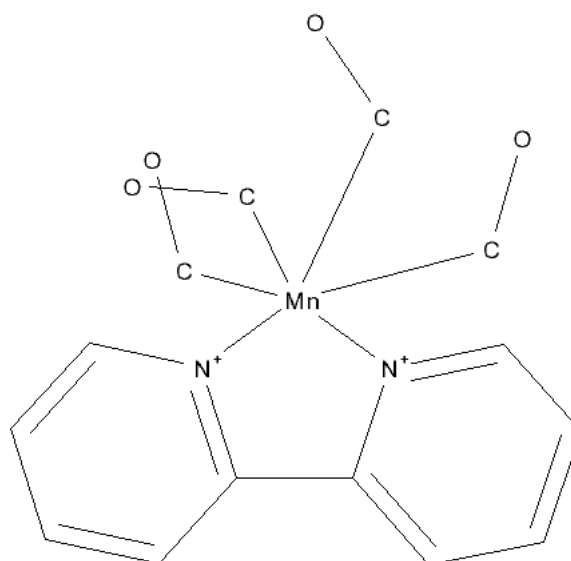

```

SMILES   : c1cc[n+]2c(c1)-c3cccc[n+]3[Mn]2([C][O])([C][O])([C][O])[C][O]
Formula  : C14H8MnN2O4+
Charge   : 1
Multiplicity : 1
Energy   : -2099.90426184 a.u.

```

#### Cartesian Co-ordinates (XYZ format)

29

```

Mn  1.10770988 -0.00033145  0.00010430
O   1.02839696 -0.00007575 -3.02361584
C   1.06125677 -0.00018217 -1.88979495
O   3.19782615 -2.12113237  0.00057730
C   2.39790964 -1.30665123  0.00038380
O   3.19911599  2.11918974  0.00068602
C   2.39861274  1.30528474  0.00047076
O   1.02705824 -0.00035234  3.02379942

```

```

C  1.06040156 -0.00036173  1.88999319
C -1.73874223 -0.73643452 -0.00016789
C -0.42738351 -2.65542126 -0.00049177
C -2.90105724 -1.50698400 -0.00003355
C -1.73833621  0.73733407 -0.00019894
C -1.54419863 -3.47781301 -0.00044077
H  0.56530935 -3.08219004 -0.00067418
C -2.80437326 -2.89186025 -0.00016100
H -3.87249660 -1.03496122  0.00018913
C -2.90022922  1.50851941 -0.00033332
H -1.41626596 -4.55167341 -0.00059138
H -3.69956398 -3.50047636 -0.00005195
C -0.42592856  2.65560246 -0.00026150
C -2.80279016  2.89334249 -0.00040118
H -3.87192440  1.03702366 -0.00041175
C -1.54229391  3.47860456 -0.00036932
H  0.56699830  3.08182740 -0.00026178
H -3.69764829  3.50244689 -0.00049281
H -1.41377354  4.55239487 -0.00043890
N -0.51215023 -1.31497335 -0.00031741
N -0.51142681  1.31520045 -0.00016155

```

## 11. [Mn(CO)BIPY]<sup>+</sup> CO DISSOCIATION W/ WATER SOLVENT

### General Information

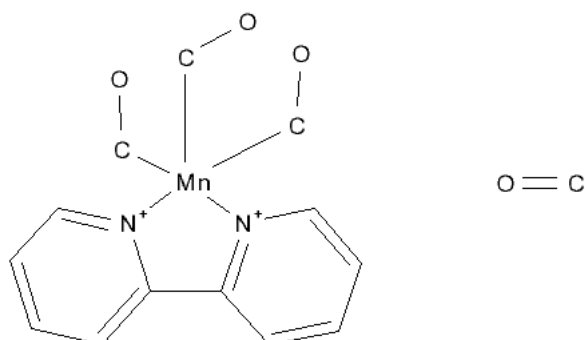

```

SMILES   : [C]=O.c1cc[n+]2c(c1)-c3cccc[n+]3[Mn]2([C][O])([C][O])[C][O]
Formula   : C14H8MnN2O4+
Charge    : 1
Multiplicity : 1
Energy    : -2099.86851758 a.u.

```

### Cartesian Co-ordinates (XYZ format)

29

|    |             |             |             |
|----|-------------|-------------|-------------|
| Mn | -0.94366896 | -1.09387684 | -0.00823910 |
| O  | 10.17200089 | -0.60716504 | 0.01059725  |
| C  | 9.04784012  | -0.68188721 | -0.00415450 |
| O  | -0.80757087 | -3.19735384 | -2.11213231 |
| C  | -0.86644804 | -2.38717175 | -1.30807006 |
| O  | -0.83128148 | -3.22246170 | 2.07197475  |
| C  | -0.88006663 | -2.40321231 | 1.27647233  |
| O  | -3.87820053 | -1.06252933 | -0.01966635 |
| C  | -2.73450184 | -1.10803699 | -0.01559976 |
| C  | -0.46754381 | 1.68325233  | -0.72523564 |
| C  | -0.78495622 | 0.41599262  | -2.64856887 |
| C  | -0.24797794 | 2.82730794  | -1.48842597 |
| C  | -0.45506448 | 1.66853368  | 0.75001830  |
| C  | -0.57852429 | 1.51756883  | -3.46609211 |
| H  | -1.00117087 | -0.55166018 | -3.07836723 |
| C  | -0.30291745 | 2.74420905  | -2.87456942 |
| H  | -0.04064062 | 3.77508688  | -1.01348162 |
| C  | -0.19929941 | 2.79259014  | 1.53115690  |
| H  | -0.63542283 | 1.40450585  | -4.54008532 |
| H  | -0.13521668 | 3.62630105  | -3.47935510 |
| C  | -0.77080989 | 0.37203425  | 2.65379500  |
| C  | -0.23846209 | 2.68539119  | 2.91617322  |
| H  | 0.02763889  | 3.74266100  | 1.07027555  |
| C  | -0.53503031 | 1.45459998  | 3.48857975  |
| H  | -1.00016630 | -0.59890801 | 3.06889486  |
| H  | -0.04245648 | 3.55212212  | 3.53449130  |
| H  | -0.58277255 | 1.32337391  | 4.56094408  |
| N  | -0.72984380 | 0.48554972  | -1.30731106 |
| N  | -0.72903693 | 0.46430582  | 1.31341398  |

---

\* Electronic address: [b.mann@sheffield.ac.uk](mailto:b.mann@sheffield.ac.uk)

† Electronic address: [roberto.motterlini@iit.it](mailto:roberto.motterlini@iit.it)
